# Supplementary material
Source: PubMed Central journal article supplement (PMC3126141)
Supplement: supp_85_8_3780__1.pdf [file supp_85_8_3780__1.pdf]

| Barcode     | Sequence (5'->3')       | Control Oligos |
|-------------|-------------------------|----------------|
| D.145       | ATGCCGACTAGCTCTCAGAT    | polio640       |
| D.147       | TGCACGCTGTCATTACTIONGCT | polio640-25    |
| D.148       | TAGTGGCTTCCATGCCTGCT    | polio645       |
| D.150       | TCAGTGATGCGAGCGTTCTT    | polio645-25    |
| D.151       | CTTGAGCTGGTGATACAGTT    | polio650       |
| D.152       | CATGTGACGTGCGTTCAGTT    | polio655       |
| D.156       | CTGGCCGTGCAAGAAAGCAA    | polio660       |
| D.160       | CCGTTAGGCAAACATGAGCA    | polio663       |
| D.162       | GCTGGATATAAATCAGGCGA    | polio693       |
| D.164       | AATAGCTCGACAAGCGGCGA    | polio693       |
| D.165       | TCATAGCCAACACAGGGCGA    | polio693-25    |
| D.166       | GCCTATCAGCCAAGTCTATA    | polio698       |
| D.167       | CGCGAGCTGCAATTTCTATA    | polio698-25    |
| D.171       | GCACAGAGATGCAATGGCAC    | polio703       |
| D.172       | ATGCACCACAGATATGGCAC    | polio7426      |
| D.173       | AAGAGTGGATCAACTGGCAC    | polio7452      |
| D.174       | ACAGCAGATGAAGCTATTCC    | polio7452-25   |
| D.175       | CAGCATGGTGAATAACTTCC    | 145-693        |
| D.177       | AATCCAGTCGGAATCATGGC    | 147-693        |
| D.178       | CACGCATTCTAATTCATGGC    | 148-693        |
| D.179       | AATCGTGTCGAAGCTATGGC    | 150-693        |
| D.181       | AGACGTGCTGAACGAGTATC    | 151-693        |
| D.182       | CCCGATGCTGAATTAGTATC    | 152-693        |
| D.183       | GAGCCAGCCATAAGCGTATC    | 156-693        |
| D.184       | CATGACTACTAAGGCGTATC    | 160-693        |
| F.285       | CGCTCACCTACAAGAGGAGA    | 162-693        |
| F.285.1-11  | TGCTCACCTATAAGAGGAGA    | 164-693        |
| F.285.1-20  | TGCTCACCTACAAGAGGAGG    | 165-693        |
| F.285.1.A   | AGCTCACCTACAAGAGGAGA    | 166-693        |
| F.285.1.G   | GGCTCACCTACAAGAGGAGA    | 167-693        |
| F.285.1.T   | TGCTCACCTACAAGAGGAGA    | 171-693        |
| F.285.10-11 | CGCTCACCTGTAAGAGGAGA    | 172-693        |
| F.285.10-12 | CGCTCACCTGCGAGAGGAGA    | 285-693        |
| F.285.10-13 | CGCTCACCTGCAGGAGGAGA    | 288-693        |
| F.285.10-14 | CGCTCACCTGCAAAAGGAGA    | 7429-145       |
| F.285.10-15 | CGCTCACCTGCAAGGGGAGA    | 7429-147       |
| F.285.10-16 | CGCTCACCTGCAAGAAGAGA    | 7429-148       |
| F.285.10-17 | CGCTCACCTGCAAGAGAAGA    | 7429-150       |
| F.285.10-18 | CGCTCACCTGCAAGAGGGGA    | 7429-151       |
| F.285.10-19 | CGCTCACCTGCAAGAGGAAA    | 7429-152       |
| F.285.10-20 | CGCTCACCTGCAAGAGGAGG    | 7429-156       |
| F.285.10.C  | CGCTCACCTCCAAGAGGAGA    | 7429-160       |
| F.285.10.G  | CGCTCACCTGCAAGAGGAGA    | 7429-162       |
| F.285.10.T  | CGCTCACCTTCAAGAGGAGA    | 7429-164       |
| F.285.11.A  | CGCTCACCTAAAAGAGGAGA    | 7429-165       |
| F.285.11.G  | CGCTCACCTAGAAGAGGAGA    | 7429-166       |
| F.285.11.T  | CGCTCACCTATAAGAGGAGA    | 7429-167       |
| F.285.12.C  | CGCTCACCTACCAGAGGAGA    | 7429-171       |

|            |                      |          |
|------------|----------------------|----------|
| F.285.12.G | CGCTCACCTACGAGAGGAGA | 7429-172 |
| F.285.12.T | CGCTCACCTACTAGAGGAGA | 7429-285 |
| F.285.13.C | CGCTCACCTACACGAGGAGA | 7429-288 |
| F.285.13.G | CGCTCACCTACAGGAGGAGA |          |
| F.285.13.T | CGCTCACCTACATGAGGAGA |          |
| F.285.14.A | CGCTCACCTACAAAAGGAGA |          |
| F.285.14.C | CGCTCACCTACAACAGGAGA |          |
| F.285.14.T | CGCTCACCTACAATAGGAGA |          |
| F.285.15.C | CGCTCACCTACAAGCGGAGA |          |
| F.285.15.G | CGCTCACCTACAAGGGGAGA |          |
| F.285.15.T | CGCTCACCTACAAGTGGAGA |          |
| F.285.16.A | CGCTCACCTACAAGAAGAGA |          |
| F.285.16.C | CGCTCACCTACAAGACGAGA |          |
| F.285.16.T | CGCTCACCTACAAGATGAGA |          |
| F.285.17.A | CGCTCACCTACAAGAGAAGA |          |
| F.285.17.C | CGCTCACCTACAAGAGCAGA |          |
| F.285.17.T | CGCTCACCTACAAGAGTAGA |          |
| F.285.18.C | CGCTCACCTACAAGAGGCGA |          |
| F.285.18.G | CGCTCACCTACAAGAGGGGA |          |
| F.285.18.T | CGCTCACCTACAAGAGGTGA |          |
| F.285.19.A | CGCTCACCTACAAGAGGAAA |          |
| F.285.19.C | CGCTCACCTACAAGAGGACA |          |
| F.285.19.T | CGCTCACCTACAAGAGGATA |          |
| F.285.2-11 | CACTCACCTATAAGAGGAGA |          |
| F.285.2-19 | CACTCACCTACAAGAGGAAA |          |
| F.285.2.A  | CACTCACCTACAAGAGGAGA |          |
| F.285.2.C  | CCCTCACCTACAAGAGGAGA |          |
| F.285.2.T  | CTCTCACCTACAAGAGGAGA |          |
| F.285.20.C | CGCTCACCTACAAGAGGAGC |          |
| F.285.20.G | CGCTCACCTACAAGAGGAGG |          |
| F.285.20.T | CGCTCACCTACAAGAGGAGT |          |
| F.285.3-11 | CGTTCACCTATAAGAGGAGA |          |
| F.285.3-18 | CGTTCACCTACAAGAGGGGA |          |
| F.285.3.A  | CGATCACCTACAAGAGGAGA |          |
| F.285.3.G  | CGGTCACCTACAAGAGGAGA |          |
| F.285.3.T  | CGTTCACCTACAAGAGGAGA |          |
| F.285.4-11 | CGCCACCTATAAGAGGAGA  |          |
| F.285.4-17 | CGCCACCTACAAGAGAAGA  |          |
| F.285.4.A  | CGCACACCTACAAGAGGAGA |          |
| F.285.4.C  | CGCCACCTACAAGAGGAGA  |          |
| F.285.4.G  | CGCGCACCTACAAGAGGAGA |          |
| F.285.5-11 | CGTTACCTATAAGAGGAGA  |          |
| F.285.5-16 | CGTTACCTACAAGAAGAGA  |          |
| F.285.5.A  | CGCTAACCTACAAGAGGAGA |          |
| F.285.5.G  | CGCTGACCTACAAGAGGAGA |          |
| F.285.5.T  | CGTTACCTACAAGAGGAGA  |          |
| F.285.6-11 | CGCTCGCCTATAAGAGGAGA |          |
| F.285.6-15 | CGCTCGCCTACAAGGGGAGA |          |
| F.285.6.C  | CGCTCCCCTACAAGAGGAGA |          |

|             |                        |
|-------------|------------------------|
| F.285.6.G   | CGCTCGCCTACAAGAGGAGA   |
| F.285.6.T   | CGCTCTCCTACAAGAGGAGA   |
| F.285.7-11  | CGCTCATCTATAAGAGGAGA   |
| F.285.7-14  | CGCTCATCTACAAAAGGAGA   |
| F.285.7.A   | CGCTCAACTACAAGAGGAGA   |
| F.285.7.G   | CGCTCAGCTACAAGAGGAGA   |
| F.285.7.T   | CGCTCATCTACAAGAGGAGA   |
| F.285.8-11  | CGCTCACTTATAAGAGGAGA   |
| F.285.8-13  | CGCTCACTTACAGGAGGAGA   |
| F.285.8.A   | CGCTCACATACAAGAGGAGA   |
| F.285.8.G   | CGCTCACGTACAAGAGGAGA   |
| F.285.8.T   | CGCTCACTTACAAGAGGAGA   |
| F.285.9-11  | CGCTCACCCATAAGAGGAGA   |
| F.285.9-12  | CGCTCACCCACGAGAGGAGA   |
| F.285.9.A   | CGCTCACCAACAAGAGGAGA   |
| F.285.9.C   | CGCTCACCCACAAGAGGAGA   |
| F.285.9.G   | CGCTCACCGACAAGAGGAGA   |
| F.288       | CACACGCACGAATTTGCATA   |
| F.288.1-11  | TACACGCACGGATTTGCATA   |
| F.288.1-20  | TACACGCACGAATTTGCATG   |
| F.288.1.A   | AACACGCACGAATTTGCATA   |
| F.288.1.G   | GACACGCACGAATTTGCATA   |
| F.288.1.T   | TACACGCACGAATTTGCATA   |
| F.288.10-11 | CACACGCACAGATTTGCATA   |
| F.288.10-12 | CACACGCACAAGTTTGCATA   |
| F.288.10-13 | CACACGCACAACTTGCATA    |
| F.288.10-14 | CACACGCACAAATCTGCATA   |
| F.288.10-15 | CACACGCACAAATTCGCATA   |
| F.288.10-16 | CACACGCACAAATTTACATA   |
| F.288.10-17 | CACACGCACAAATTTGTATA   |
| F.288.10-18 | CACACGCACAAATTTGCGTA   |
| F.288.10-19 | CACACGCACAAATTTGCACA   |
| F.288.10-20 | CACACGCACAAATTTGCATG   |
| F.288.10.A  | CACACGCACAAATTTGCATA   |
| F.288.10.C  | CACACGCACCAATTTGCATA   |
| F.288.10.T  | CACACGCACACTAATTTGCATA |
| F.288.11.C  | CACACGCACGCATTTGCATA   |
| F.288.11.G  | CACACGCACGGATTTGCATA   |
| F.288.11.T  | CACACGCACGTATTTGCATA   |
| F.288.12.C  | CACACGCACGACTTTGCATA   |
| F.288.12.G  | CACACGCACGAGTTTGCATA   |
| F.288.12.T  | CACACGCACGATTTTGCATA   |
| F.288.13.A  | CACACGCACGAAATTGCATA   |
| F.288.13.C  | CACACGCACGAACTTGCATA   |
| F.288.13.G  | CACACGCACGAAGTTGCATA   |
| F.288.14.A  | CACACGCACGAATATGCATA   |
| F.288.14.C  | CACACGCACGAATCTGCATA   |
| F.288.14.G  | CACACGCACGAATGTGCATA   |
| F.288.15.A  | CACACGCACGAATTAGCATA   |

|            |                      |
|------------|----------------------|
| F.288.15.C | CACACGCACGAATTCGCATA |
| F.288.15.G | CACACGCACGAATTGGCATA |
| F.288.16.A | CACACGCACGAATTTACATA |
| F.288.16.C | CACACGCACGAATTTCCATA |
| F.288.16.T | CACACGCACGAATTTTCATA |
| F.288.17.A | CACACGCACGAATTTGAATA |
| F.288.17.G | CACACGCACGAATTTGGATA |
| F.288.17.T | CACACGCACGAATTTGTATA |
| F.288.18.C | CACACGCACGAATTTGCCTA |
| F.288.18.G | CACACGCACGAATTTGCGTA |
| F.288.18.T | CACACGCACGAATTTGCTTA |
| F.288.19.A | CACACGCACGAATTTGCAA  |
| F.288.19.C | CACACGCACGAATTTGCACA |
| F.288.19.G | CACACGCACGAATTTGCAGA |
| F.288.2-11 | CGCACGCACGGATTTGCATA |
| F.288.2-19 | CGCACGCACGAATTTGCACA |
| F.288.2.C  | CCCACGCACGAATTTGCATA |
| F.288.2.G  | CGCACGCACGAATTTGCATA |
| F.288.2.T  | CTCACGCACGAATTTGCATA |
| F.288.20.C | CACACGCACGAATTTGCATC |
| F.288.20.G | CACACGCACGAATTTGCATG |
| F.288.20.T | CACACGCACGAATTTGCATT |
| F.288.3-11 | CATACGCACGGATTTGCATA |
| F.288.3-18 | CATACGCACGAATTTGCGTA |
| F.288.3.A  | CAAACGCACGAATTTGCATA |
| F.288.3.G  | CAGACGCACGAATTTGCATA |
| F.288.3.T  | CATACGCACGAATTTGCATA |
| F.288.4-11 | CACGCGCACGGATTTGCATA |
| F.288.4-17 | CACGCGCACGAATTTGTATA |
| F.288.4.C  | CACCCGCACGAATTTGCATA |
| F.288.4.G  | CACGCGCACGAATTTGCATA |
| F.288.4.T  | CACTCGCACGAATTTGCATA |
| F.288.5-11 | CACATGCACGGATTTGCATA |
| F.288.5-16 | CACATGCACGAATTTACATA |
| F.288.5.A  | CACAAGCACGAATTTGCATA |
| F.288.5.G  | CACAGGCACGAATTTGCATA |
| F.288.5.T  | CACATGCACGAATTTGCATA |
| F.288.6-11 | CACACACACGGATTTGCATA |
| F.288.6-15 | CACACACACGAATTCGCATA |
| F.288.6.A  | CACACACACGAATTTGCATA |
| F.288.6.C  | CACACCCACGAATTTGCATA |
| F.288.6.T  | CACACTCACGAATTTGCATA |
| F.288.7-11 | CACACGTACGGATTTGCATA |
| F.288.7-14 | CACACGTACGAATCTGCATA |
| F.288.7.A  | CACACGAACGAATTTGCATA |
| F.288.7.G  | CACACGGACGAATTTGCATA |
| F.288.7.T  | CACACGTACGAATTTGCATA |
| F.288.8-11 | CACACGCGCGGATTTGCATA |
| F.288.8-13 | CACACGCGCGAACTTGCATA |

|            |                       |
|------------|-----------------------|
| F.288.8.C  | CACACGCCCGAATTTGCATA  |
| F.288.8.G  | CACACGCGCGAATTTGCATA  |
| F.288.8.T  | CACACGCTCGAATTTGCATA  |
| F.288.9-11 | CACACGCATGGATTTGCATA  |
| F.288.9-12 | CACACGCATGAGTTTGCATA  |
| F.288.9.A  | CACACGCAAGAATTTGCATA  |
| F.288.9.G  | CACACGCAGGAATTTGCATA  |
| F.288.9.T  | CACACGCATGAATTTGCATA  |
| for20.145  | TTAGGGAGCACATCCATGCC  |
| for20.147  | CAGACGTAACCAGTGATGCC  |
| for20.148  | TGAGATCCACCATTACAGGC  |
| for20.150  | GATATACAGCCACAGCAGGC  |
| for20.151  | ATATTCAGACCAGCGCAGGC  |
| for20.152  | CATACAGCGTCAGACAGATC  |
| for20.156  | TAATGTGATGGAAGCGTCTC  |
| for20.160  | AGCATGTGGCATAACCTTTC  |
| for20.162  | CGCGATCTGATAAGTGTTTC  |
| for20.164  | CTACGAGACGCATTATCACG  |
| for20.165  | TAGAGGCACTCATGCTCACG  |
| for20.166  | CATATACTATCACGCAGACG  |
| for20.167  | CATCTCGATTAAGTCAGACG  |
| for20.171  | CCACTCTCTGTAATGTATGG  |
| for20.172  | ATACAGCCTGGCACAGTCTG  |
| for20.173  | CACGATTGTGTAAGAGTCTG  |
| for20.174  | TGCAACAAGAGATACGTCTG  |
| for20.175  | TATTCATGGCGCACCGTCTG  |
| for20.177  | ACATGAGGAGCAGTTTGCAT  |
| for20.178  | GACGGCACTTTGCACATCAT  |
| for20.179  | GGGTCATCACGGCTCATCAT  |
| for20.181  | ATTCTGATGCGAGAGCCGCT  |
| for20.182  | ATATTGTCTCACGCGGCGCT  |
| for20.183  | ACATCAGTTGCAGTGGCGCT  |
| for20.184  | GCGAATATCAAACCTTGCCA  |
| for20.185  | CCATGCGGCAAATGAATCCA  |
| for20.186  | TGGGCACTCACAATAATCCA  |
| for20.187  | GCTACAGTGAAATCCATCCA  |
| for20.188  | GCTCCAGAGACATATTGAGA  |
| for20.189  | TGCCGCCGAACAGCAATAGA  |
| for20.190  | CTTGCAGGTAAAGGCATAGA  |
| for20.191  | CCGCGATACCAATTCATAGA  |
| for20.192  | GCACGTCAGCAACGCAGATA  |
| for20.193  | CCTAGCACGCAATTCAGATA  |
| for20.194  | CGTTGATAGCAAGCGAGATA  |
| for20.195  | CCATGCGAGCAACTGAGATA  |
| for20.196  | GTCATAGACTCAATGCACAC  |
| for20.197  | TGCAGTAAGCTCAATCACAC  |
| for20.198  | TGCGACAGAGAAGCTCACAC  |
| for20.199  | CCGATAGCAGAATGTACACAC |
| for20.202  | AGAATGCGTCTCAAGCTGCC  |

|           |                       |
|-----------|-----------------------|
| for20.204 | AACATGCTCGAATCGCAGGC  |
| for20.205 | ATAATCAGCGGGAATCAGGC  |
| for20.206 | GCTGTGAATGAATATCAGGC  |
| for20.207 | TGATCGCTAACAGCTCAGGC  |
| for20.208 | AGCCACTACTAAGTCAGATC  |
| for20.209 | GCACTAACTTCACAGAGATC  |
| for20.210 | CCGCCATAGTAATAGAGATC  |
| for20.211 | CCTTGAGCATAATCGAGATC  |
| for20.212 | ATGTTCCGGAAGAGCTGTCTC |
| for20.213 | ACATGAGCCATAAGTGTCTC  |
| for20.214 | ACACGCTGTGAACTTGTCTC  |
| for20.215 | GGACACTATACAGCATTCTC  |
| for20.219 | ATATGGACACGCGCCTCAAG  |
| for20.220 | CATTAGTGACCAGCGAGACG  |
| for20.221 | CTATACGCAGGCATGAGACG  |
| for20.223 | TATAGTCACGCAGCACGACG  |
| for20.224 | ATTCCGCACGCGCATTATGG  |
| for20.225 | AACTACGATGCAGAGACTGG  |
| for20.226 | ATTGCTGCTACACCGACTGG  |
| for20.227 | ATGATGACCGCACTGACTGG  |
| for20.228 | TACGTCTGACCATGCGTCTG  |
| for20.241 | GCAGATAGCACAATCGGCCA  |
| for20.243 | CAGCAGGTGAAACGATGCCA  |
| for20.244 | GCCGAGATCACAATATGCCA  |
| for20.245 | TCGCCCACTACAATGAGAGA  |
| for20.246 | TTCTGGCAAGCAATAGAGA   |
| for20.247 | CCTGCTGATAAAGTACGAGA  |
| for20.248 | GCATCACAGCAATGGGCATA  |
| for20.249 | GCATTCTACCAAGCTGCATA  |
| for20.250 | CAAGGTGGACCAAGTGCATA  |
| for20.253 | TGCAACTGGCTTCAATTCGC  |
| for20.254 | CATGGTTAGGAAGCATTTCGC |
| for20.255 | CCTGCACTAAGATTATTCGC  |
| for20.256 | CCACTGGATACAGATTCATC  |
| for20.257 | CGACTACAGGCATATTCATC  |
| for20.258 | GCGCTCGATATAACTTCATC  |
| for20.259 | CAGAGTAACGCATGTTTCATC |
| for20.261 | CAGATGACTGAATGGCTCTC  |
| for20.264 | CTTCAGAGTAGACTAGATGG  |
| for20.265 | CTATTCTGGAGCACCGATGG  |
| for20.266 | ACTGATAGACGATTTCGATGG |
| for20.268 | GAGTACGCTCCATAGCTCTG  |
| for20.269 | TTAGGCTATGCACCGCTCTG  |
| for20.270 | TATTAGCTGCCAGGGCTCTG  |
| for20.271 | AACGATGTAGCATGGCTCTG  |
| for20.272 | CAATGTAGAGGATCGTGCAT  |
| for20.274 | ATCATTGTCCGAGGGTGCAT  |
| for20.277 | ATCACTGTAGTCACGTAGCT  |
| for20.278 | TCATTGCTGGCAGTGTAGCT  |

|           |                      |
|-----------|----------------------|
| for20.279 | AGTGCAGTCGGCCATTAGCT |
| for20.280 | GCCAGATTGAAACACTGCCA |
| for20.281 | GAGAGAGTCACAACCTGCCA |
| for20.282 | CCAGCATTGAAATTCTGCCA |
| for20.283 | CCAGTCACAAGATAGTGCCA |
| for20.284 | CTGAAGGAGCAATTTGAGA  |
| for20.285 | CGCTCACCTACAAGAGGAGA |
| for20.286 | TCCTATGAGACAATGGGAGA |
| for20.287 | GCGCCATCGAACCAATGAGA |
| for20.288 | CACACGCACGAATTTGCATA |

Sequence (5'->3')

---

AAAGTGAGACTCATTATCTA  
AAAGTGAGACTCATTATCTATCTGT  
GAGACTCATTATCTATCTGT  
GAGACTCATTATCTATCTGTTTGCT  
TCATTATCTATCTGTTTGCT  
ATCTATCTGTTTGCTGGATC  
TCTGTTTGCTGGATCCGCGC  
GTTTGCTGGATCCGCGCGC  
GAGCTCCATTGAGTGTGTTT  
GAGCTCCATTGAGTGTGTTT  
GAGCTCCATTGAGTGTGTTTACTCT  
CCATTGAGTGTGTTTACTCT  
CCATTGAGTGTGTTTACTCTAAGTA  
GAGTGTGTTTACTCTAAGTA  
GCCGTTGGCTTGACTCATTT  
CCCTACCTCAGTCGAATTGG  
GGGCCCTACCTCAGTCGAATTGGAT  
TTAGGGAGCACATCCATGCCGAGCTCCATTGAGTGTGTTT  
CAGACGTAACCAAGTGATGCCGAGCTCCATTGAGTGTGTTT  
TGAGATCCACCATTACAGGCGAGCTCCATTGAGTGTGTTT  
GATATACAGCCACAGCAGGCGAGCTCCATTGAGTGTGTTT  
ATATTACAGACCAGCGCAGGCGAGCTCCATTGAGTGTGTTT  
CATAACAGCGTCAGACAGATCGAGCTCCATTGAGTGTGTTT  
TAATGTGATGGAAGCGTCTCGAGCTCCATTGAGTGTGTTT  
AGCATGTGGCATAACCTTTTCGAGCTCCATTGAGTGTGTTT  
CGCGATCTGATAAGTGTTCGAGCTCCATTGAGTGTGTTT  
CTACGAGACGCATTATCACGGAGCTCCATTGAGTGTGTTT  
TAGAGGCACTCATGCTCACGGAGCTCCATTGAGTGTGTTT  
CATATACTATCACGCAGACGGAGCTCCATTGAGTGTGTTT  
CATCTCGATTAAGTCAGACGGAGCTCCATTGAGTGTGTTT  
CCACTCTCTGTAATGTATGGGAGCTCCATTGAGTGTGTTT  
ATACAGCCTGGCACAGTCTGGAGCTCCATTGAGTGTGTTT  
CGCTCACCTACAAGAGGAGAGAGCTCCATTGAGTGTGTTT  
CACACGCACGAATTTGCATAGAGCTCCATTGAGTGTGTTT  
GTTGGCTTGACTCATTTTAGTAATTAGGGAGCACATCCATGCC  
GTTGGCTTGACTCATTTTAGTAACAGACGTAACCAAGTGATGCC  
GTTGGCTTGACTCATTTTAGTAATGAGATCCACCATTACAGGC  
GTTGGCTTGACTCATTTTAGTAAGATATACAGCCACAGCAGGC  
GTTGGCTTGACTCATTTTAGTAAATATTCAGACCAGCGCAGGC  
GTTGGCTTGACTCATTTTAGTAACATACAGCGTCAGACAGATC  
GTTGGCTTGACTCATTTTAGTAATAATGTGATGGAAGCGTCTC  
GTTGGCTTGACTCATTTTAGTAAAGCATGTGGCATAACCTTTTC  
GTTGGCTTGACTCATTTTAGTAACGCGATCTGATAAGTGTTC  
GTTGGCTTGACTCATTTTAGTAACTACGAGACGCATTATCACG  
GTTGGCTTGACTCATTTTAGTAATAGAGGCACTCATGCTCACG  
GTTGGCTTGACTCATTTTAGTAACATATACTATCACGCAGACG  
GTTGGCTTGACTCATTTTAGTAACATCTCGATTAAGTCAGACG  
GTTGGCTTGACTCATTTTAGTAACCACTCTCTGTAATGTATGG



GTTGGCTTGACTCATTITTAGTAAATACAGCCTGGCACAGTCTG  
GTTGGCTTGACTCATTITTAGTAACGCTCACCTACAAGAGGAGA  
GTTGGCTTGACTCATTITTAGTAACACACGCACGAATTTGCATA
