# Supplementary material
Source: PubMed Central journal article supplement (PMC3126141)
Supplement: supp_85_8_3780__2.pdf [file supp_85_8_3780__2.pdf]

| Barcode   | Forward Primer | Sequence (5'->3')               |
|-----------|----------------|---------------------------------|
| for20.145 | F.145          | CGCGCTTAGGGAGCACATCCATGCCGAGCT  |
| for20.147 | F.147          | CGCGCCAGACGTAACCAGTGATGCCGAGCT  |
| for20.148 | F.148          | CGCGCTGAGATCCACCATTACAGGCGAGCT  |
| for20.150 | F.150          | CGCGCGATATACAGCCACAGCAGGCGAGCT  |
| for20.151 | F.151          | CGCGCATATTAGACCAGCGCAGGCGAGCT   |
| for20.152 | F.152          | CGCGCCATACAGCGTCAGACAGATCGAGCT  |
| for20.156 | F.156          | CGCGCTAATGTGATGGAAGCGTCTCGAGCT  |
| for20.160 | F.160          | CGCGCAGCATGTGGCATAACCTTTCGAGCT  |
| for20.162 | F.162          | CGCGCCGCGATCTGATAAGTGTTCGAGCT   |
| for20.164 | F.164          | CGCGCCTACGAGACGCATTATCACGGAGCT  |
| for20.165 | F.165          | CGCGCTAGAGGCACTCATGCTCACGGAGCT  |
| for20.166 | F.166          | CGCGCCATATACTATCACGCAGACGGAGCT  |
| for20.167 | F.167          | CGCGCCATCTCGATTAAGTCAGACGGAGCT  |
| for20.171 | F.171          | CGCGCCCCTCTCTGTAATGTATGGGAGCT   |
| for20.172 | F.172          | CGCGCATAACAGCCTGGCACAGTCTGGAGCT |
| for20.173 | F.173          | CGCGCCACGATTGTGTAAGAGTCTGGAGCT  |
| for20.174 | F.174          | CGCGCTGCAACAAGAGATACGTCTGGAGCT  |
| for20.175 | F.175          | CGCGCTATTCATGGCGCACCGTCTGGAGCT  |
| for20.177 | F.177          | CGCGCACATGAGGAGCAGTTTGCATGAGCT  |
| for20.178 | F.178          | CGCGCGACGGCACTTTGCACATCATGAGCT  |
| for20.179 | F.179          | CGCGCGGGTCATCACGGCTCATCATGAGCT  |
| for20.181 | F.181          | CGCGCATTCTGATGCGAGAGCCGCTGAGCT  |
| for20.182 | F.182          | CGCGCATATTGTCTCACGCGGCGCTGAGCT  |
| for20.183 | F.183          | CGCGCACATCAGTTGCAGTGGCGCTGAGCT  |
| for20.184 | F.184          | CGCGCGCGAATATCAAACCTTGCCAGAGCT  |
| for20.185 | F.185          | CGCGCCCATGCGGCAAATGAATCCAGAGCT  |
| for20.186 | F.186          | CGCGCTGGGCACTACAATAATCCAGAGCT   |
| for20.187 | F.187          | CGCGCGCTACAGTGAAATCCATCCAGAGCT  |
| for20.188 | F.188          | CGCGCGCTCCAGAGACATATTGAGAGAGCT  |
| for20.189 | F.189          | CGCGCTGCCGCCGAACAGCAATAGAGAGCT  |
| for20.190 | F.190          | CGCGCCTTGCAGGTAAAGGCATAGAGAGCT  |
| for20.191 | F.191          | CGCGCCCGCGATACCAATTCATAGAGAGCT  |
| for20.192 | F.192          | CGCGCGCACGTCAGCAACGCAGATAGAGCT  |
| for20.193 | F.193          | CGCGCCCTAGCACGCAATTCAGATAGAGCT  |
| for20.194 | F.194          | CGCGCCGTTGATAGCAAGCGAGATAGAGCT  |
| for20.195 | F.195          | CGCGCCCATGCGAGCAACTGAGATAGAGCT  |
| for20.196 | F.196          | CGCGCGTCATAGACTCAATGCACACGAGCT  |
| for20.197 | F.197          | CGCGCTGCAGTAAGCTCAATCACACGAGCT  |
| for20.198 | F.198          | CGCGCTGCGACAGAGAAGCTCACACGAGCT  |
| for20.199 | F.199          | CGCGCCCGATAGCAGAATGTCACACGAGCT  |
| for20.202 | F.202          | CGCGCAGAATGCGTCTCAAGCTGCCGAGCT  |
| for20.204 | F.204          | CGCGCAACATGCTCGAATCGCAGGCGAGCT  |
| for20.205 | F.205          | CGCGCATAATCAGCGGGAATCAGGCGAGCT  |
| for20.206 | F.206          | CGCGCGCTGTGAATGAATATCAGGCGAGCT  |
| for20.207 | F.207          | CGCGCTGATCGCTAACAGCTCAGGCGAGCT  |
| for20.208 | F.208          | CGCGCAGCCACTACTAAGTCAGATCGAGCT  |
| for20.209 | F.209          | CGCGCGCACTAACTTCACAGAGATCGAGCT  |
| for20.210 | F.210          | CGCGCCCGCCATAGTAATAGAGATCGAGCT  |
| for20.211 | F.211          | CGCGCCCTTGAGCATAATCGAGATCGAGCT  |
| for20.212 | F.212          | CGCGCATGTTTCGGAAGAGCTGTCTCGAGCT |
| for20.213 | F.213          | CGCGCACATGAGCCATAAGTGTCTCGAGCT  |
| for20.214 | F.214          | CGCGCACACGCTGTGAACTTGTCTCGAGCT  |

|           |       |                                 |
|-----------|-------|---------------------------------|
| for20.215 | F.215 | CGCGCGGACACTATACAGCATTCTCGAGCT  |
| for20.219 | F.219 | CGCGCATATGGACACGCGCCTCAAGGAGCT  |
| for20.220 | F.220 | CGCGCCATTAGTGACCAGCGAGACGGAGCT  |
| for20.221 | F.221 | CGCGCCTATACGCAGGCATGAGACGGAGCT  |
| for20.223 | F.223 | CGCGCTATAGTCACGCAGCACGACGGAGCT  |
| for20.224 | F.224 | CGCGCATTCCGCACGCGCATTATGGGAGCT  |
| for20.225 | F.225 | CGCGCAACTACGATGCAGAGACTGGGAGCT  |
| for20.226 | F.226 | CGCGCATTGCTGCTACACCGACTGGGAGCT  |
| for20.227 | F.227 | CGCGCATGATGACCGCACTGACTGGGAGCT  |
| for20.228 | F.228 | CGCGCTACGTCTGACCATGCGTCTGGAGCT  |
| for20.241 | F.241 | CGCGCGCAGATAGCACAAATCGGCCAGAGCT |
| for20.243 | F.243 | CGCGCCAGCAGGTGAAACGATGCCAGAGCT  |
| for20.244 | F.244 | CGCGCGCCGAGATCACAATATGCCAGAGCT  |
| for20.245 | F.245 | CGCGCTCGCCCCTACAATGAGAGAGAGCT   |
| for20.246 | F.246 | CGCGCTTCTGGCAAGCAATAGAGAGAGCT   |
| for20.247 | F.247 | CGCGCCCTGCTGATAAAGTACGAGAGAGCT  |
| for20.248 | F.248 | CGCGCGCATCACAGCAATGGGCATAGAGCT  |
| for20.249 | F.249 | CGCGCGCATTCTACCAAGCTGCATAGAGCT  |
| for20.250 | F.250 | CGCGCCAAGGTGGACCAAGTGCATAGAGCT  |
| for20.253 | F.253 | CGCGCTGCAACTGGCTTCAATTCGCGAGCT  |
| for20.254 | F.254 | CGCGCCATGGTTAGGAAGCATTTCGCGAGCT |
| for20.255 | F.255 | CGCGCCCTGCACTAAGATTATTCGCGAGCT  |
| for20.256 | F.256 | CGCGCCCCTGGATACAGATTCATCGAGCT   |
| for20.257 | F.257 | CGCGCCGACTACAGGCATATTCATCGAGCT  |
| for20.258 | F.258 | CGCGCGCGCTCGATATAACTTCATCGAGCT  |
| for20.259 | F.259 | CGCGCCAGAGTAACGCATGTTTCATCGAGCT |
| for20.261 | F.261 | CGCGCCAGATGACTGAATGGCTCTCGAGCT  |
| for20.264 | F.264 | CGCGCCTTCAGAGTAGACTAGATGGGAGCT  |
| for20.265 | F.265 | CGCGCCTATTCTGGAGCACCGATGGGAGCT  |
| for20.266 | F.266 | CGCGCACTGATAGACGATTCGATGGGAGCT  |
| for20.268 | F.268 | CGCGCGAGTACGCTCCATAGCTCTGGAGCT  |
| for20.269 | F.269 | CGCGCTTAGGCTATGCACCGCTCTGGAGCT  |
| for20.270 | F.270 | CGCGCTATTAGCTGCCAGGGCTCTGGAGCT  |
| for20.271 | F.271 | CGCGCAACGATGTAGCATGGCTCTGGAGCT  |
| for20.272 | F.272 | CGCGCCAATGTAGAGGATCGTGCATGAGCT  |
| for20.274 | F.274 | CGCGCATCATTGTGCGCAGGGTGCATGAGCT |
| for20.277 | F.277 | CGCGCATCACTGTAGTCACGTAGCTGAGCT  |
| for20.278 | F.278 | CGCGCTCATTGCTGGCAGTGTAGCTGAGCT  |
| for20.279 | F.279 | CGCGCAGTGCAGTCGGCCATTAGCTGAGCT  |
| for20.280 | F.280 | CGCGCGCCAGATTGAAACACTGCCAGAGCT  |
| for20.281 | F.281 | CGCGCGAGAGAGTCAACCTGCCAGAGCT    |
| for20.282 | F.282 | CGCGCCCAGCATTGAAATTCTGCCAGAGCT  |
| for20.283 | F.283 | CGCGCCCAGTCACAAGATAGTGCCAGAGCT  |
| for20.284 | F.284 | CGCGCCTGAAGGAGCAATTTTCGAGAGAGCT |
| for20.285 | F.285 | CGCGCCGCTCACCTACAAGAGGAGAGAGCT  |
| for20.286 | F.286 | CGCGCTCCTATGAGACAATGGGAGAGAGCT  |
| for20.287 | F.287 | CGCGCGCGCCATCGAACCAATGAGAGAGCT  |
| for20.288 | F.288 | CGCGCCACACGCACGAATTTGCATAGAGCT  |

| Reverse Primer | Sequence (5'->3')       |
|----------------|-------------------------|
| re.145         | CGGCATGGATGTGCTCCCTAAG  |
| re.147         | CGGCATCACTGGTTACGTCTGG  |
| re.148         | CGCCTGTAATGGTGGATCTCAG  |
| re.150         | CGCCTGCTGTGGCTGTATATCG  |
| re.151         | CGCCTGCGCTGGTCTGAATATG  |
| re.152         | CGATCTGTCTGACGCTGTATGG  |
| re.156         | CGAGACGCTTCCATCACATTAG  |
| re.160         | CGAAAGGTTATGCCACATGCTG  |
| re.162         | CGAAACACTTATCAGATCGCGG  |
| re.164         | CCGTGATAATGCGTCTCGTAGG  |
| re.165         | CCGTGAGCATGAGTGCCTCTAG  |
| re.166         | CCGTCTGCGTGATAGTATATGG  |
| re.167         | CCGTCTGACTTAATCGAGATGG  |
| re.171         | CCCATACATTACAGAGAGTGGG  |
| re.172         | CCAGACTGTGCCAGGCTGTATG  |
| re.173         | CCAGACTCTTACACAATCGTGG  |
| re.174         | CCAGACGTATCTCTTGTTGCAG  |
| re.175         | CCAGACGGTGCGCCATGAATAG  |
| re.177         | CATGCAAACCTGCTCCTCATGTG |
| re.178         | CATGATGTGCAAAGTGCCGTCG  |
| re.179         | CATGATGAGCCGTGATGACCCG  |
| re.181         | CAGCGGCTCTCGCATCAGAATG  |
| re.182         | CAGCGCCGCGTGAGACAATATG  |
| re.183         | CAGCGCCACTGCAACTGATGTG  |
| re.184         | CTGGCAAGGTTTGATATTCGCG  |
| re.185         | CTGGATTCATTTGCCGCATGGG  |
| re.186         | CTGGATTATTGTGAGTGCCCAG  |
| re.187         | CTGGATGGATTTCACTGTAGCG  |
| re.188         | CTCTCAATATGTCTCTGGAGCG  |
| re.189         | CTCTATTGCTGTTGCGCGGCAG  |
| re.190         | CTCTATGCCTTTACCTGCAAGG  |
| re.191         | CTCTATGAATTGGTATCGCGGG  |
| re.192         | CTATCTGCGTTGCTGACGTGCG  |
| re.193         | CTATCTGAATTGCGTGCTAGGG  |
| re.194         | CTATCTCGCTTGCTATCAACGG  |
| re.195         | CTATCTCAGTTGCTCGCATGGG  |
| re.196         | CGTGTGCATTGAGTCTATGACG  |
| re.197         | CGTGTGATTGAGCTTACTGCAG  |
| re.198         | CGTGTGAGCTTCTCTGTCGCAG  |
| re.199         | CGTGTGACATTCTGCTATCGGG  |
| re.202         | CGGCAGCTTGAGACGCATTCTG  |
| re.204         | CGCCTGCGATTCGAGCATGTTG  |
| re.205         | CGCCTGATTCCCGCTGATTATG  |
| re.206         | CGCCTGATATTCATTCACAGCG  |
| re.207         | CGCCTGAGCTGTTAGCGATCAG  |
| re.208         | CGATCTGACTTAGTAGTGGCTG  |
| re.209         | CGATCTCTGTGAAGTTAGTGCG  |
| re.210         | CGATCTCTATTACTATGGCGGG  |
| re.211         | CGATCTCGATTATGCTCAAGGG  |
| re.212         | CGAGACAGCTCTTCCGAACATG  |
| re.213         | CGAGACACTTATGGCTCATGTG  |
| re.214         | CGAGACAAGTTCACAGCGTGTG  |

re.215 CGAGAATGCTGTATAGTGTCCG  
re.219 CCTTGAGGCGCGTGTCCATATG  
re.220 CCGTCTCGCTGGTCACTAATGG  
re.221 CCGTCTCATGCCTGCGTATAGG  
re.223 CCGTCGTGCTGCGTGACTATAG  
re.224 CCCATAATGCGCGTGCGGAATG  
re.225 CCCAGTCTCTGCATCGTAGTTG  
re.226 CCCAGTCGGTGTAGCAGCAATG  
re.227 CCCAGTCAGTGCGGTCATCATG  
re.228 CCAGACGCATGGTCAGACGTAG  
re.241 CTGGCCGATTGTGCTATCTGCG  
re.243 CTGGCATCGTTTCACCTGCTGG  
re.244 CTGGCATATTGTGATCTCGGCG  
re.245 CTCTCTCATTGTAGTGGGCGAG  
re.246 CTCTCTATTGCTTGCCAGGAAG  
re.247 CTCTCGTACTTTATCAGCAGGG  
re.248 CTATGCCATTGCTGTGATGCG  
re.249 CTATGCAGCTTGGTAGAATGCG  
re.250 CTATGCACTTGGTCCACCTTGG  
re.253 CGCGAATTGAAGCCAGTTGCAG  
re.254 CGCGAATGCTTCCTAACCATGG  
re.255 CGCGAATAATCTTAGTGCAGGG  
re.256 CGATGAATCTGTATCCAGTGGG  
re.257 CGATGAATATGCCTGTAGTCGG  
re.258 CGATGAAGTTATATCGAGCGCG  
re.259 CGATGAACATGCGTTACTCTGG  
re.261 CGAGAGCCATTCAGTCATCTGG  
re.264 CCCATCTAGTCTACTCTGAAGG  
re.265 CCCATCGGTGCTCCAGAATAGG  
re.266 CCCATCGAATCGTCTATCAGTG  
re.268 CCAGAGCTATGGAGCGTACTCG  
re.269 CCAGAGCGGTGCATAGCCTAAG  
re.270 CCAGAGCCCTGGCAGCTAATAG  
re.271 CCAGAGCCATGCTACATCGTTG  
re.272 CATGCACGATCCTCTACATTGG  
re.274 CATGCACCCTGCGACAATGATG  
re.277 CAGCTACGTGACTACAGTGATG  
re.278 CAGCTACACTGCCAGCAATGAG  
re.279 CAGCTAATGGCCGACTGCACTG  
re.280 CTGGCAGTGTTC AATCTGGCG  
re.281 CTGGCAGGTTGTGACTCTCTCG  
re.282 CTGGCAGAATTTCAATGCTGGG  
re.283 CTGGCACTATCTTGTGACTGGG  
re.284 CTCTCGAAATTGCTCCTTCAGG  
re.285 CTCTCCTCTTGTAGGTGAGCGG  
re.286 CTCTCCCATTGTCTCATAGGAG  
re.287 CTCTCATTGGTTCGATGGCGCG  
re.288 CTATGCAAATTCGTGCGTGTGG
