# Supplementary material
Source: PubMed Central journal article supplement (PMC3126141)
Supplement: supp_85_8_3780__3.pdf [file supp_85_8_3780__3.pdf]

Forward PCR Primer

U148

U150

U151

U152

U162

U164

U166

U167

U172

U173

U174

U178

U179

U182

U183

U184

U186

U187

U188

U189

U190

U191

U192

U193

U194

U197

U198

U204

U205

U207

U208

U209

U210

U211

U214

U215

U220

U223

U225

U226

U241

U246

U247

U249

U250

U253

U255

U256

SPI-1U  
SPI-2U  
SPI-3U  
SPI-4U  
SPI-5U  
SPI-6U  
SPI-7U  
SPI-8U  
SPI-9U  
SPI-10U  
SPI-11U  
SPI-12U

Sequence (5'->3')

ATGCGCGCTGAGATCCACCATTACAGGCGAGCTCCATTGAGTGTGTTTAC  
ATGCGCGGATATACAGCCACAGCAGGCGAGCTCCATTGAGTGTGTTTAC  
ATGCGCGCATATTCAGACCAGCGCAGGCGAGCTCCATTGAGTGTGTTTAC  
ATGCGCGCCATACAGCGTCAGACAGATCGAGCTCCATTGAGTGTGTTTAC  
ATGCGCGCCGCGATCTGATAAGTGTTCGAGCTCCATTGAGTGTGTTTAC  
ATGCGCGCCTACGAGACGCATTATCACGGAGCTCCATTGAGTGTGTTTAC  
ATGCGCGCCATATACTATCACGCAGACGGAGCTCCATTGAGTGTGTTTAC  
ATGCGCGCCATCTCGATTAAGTCAGACGGAGCTCCATTGAGTGTGTTTAC  
ATGCGCGCATACAGCCTGGCACAGTCTGGAGCTCCATTGAGTGTGTTTAC  
ATGCGCGCCACGATTGTGTAAGAGTCTGGAGCTCCATTGAGTGTGTTTAC  
ATGCGCGCTGCAACAAGAGATACGTCTGGAGCTCCATTGAGTGTGTTTAC  
ATGCGCGCGACGGCACTTGCACATCATGAGCTCCATTGAGTGTGTTTAC  
ATGCGCGCGGGTCATCACGGCTCATCATGAGCTCCATTGAGTGTGTTTAC  
ATGCGCGCATATTGTCTCACGCGCGCTGAGCTCCATTGAGTGTGTTTAC  
ATGCGCGCACATCAGTTGCAGTGGCGCTGAGCTCCATTGAGTGTGTTTAC  
ATGCGCGCGCGAATATCAAACCTTGCCAGAGCTCCATTGAGTGTGTTTAC  
ATGCGCGCTGGGCACTACAATAATCCAGAGCTCCATTGAGTGTGTTTAC  
ATGCGCGCGCTACAGTGAATCCATCCAGAGCTCCATTGAGTGTGTTTAC  
ATGCGCGCGCTCCAGAGACATATTGAGAGAGCTCCATTGAGTGTGTTTAC  
ATGCGCGCTGCCGCCGAACAGCAATAGAGAGCTCCATTGAGTGTGTTTAC  
ATGCGCGCCTTGCAGGTAAGGCATAGAGAGCTCCATTGAGTGTGTTTAC  
ATGCGCGCCCCGCGATACCAATTCATAGAGAGCTCCATTGAGTGTGTTTAC  
ATGCGCGCGCACGTCAGCAACGCAGATAGAGCTCCATTGAGTGTGTTTAC  
ATGCGCGCCCTAGCACGCAATTCAGATAGAGCTCCATTGAGTGTGTTTAC  
ATGCGCGCCGTTGATAGCAAGCGAGATAGAGCTCCATTGAGTGTGTTTAC  
ATGCGCGCTGCAGTAAGCTCAATCACACGAGCTCCATTGAGTGTGTTTAC  
ATGCGCGCTGCGACAGAGAAGCTCACACGAGCTCCATTGAGTGTGTTTAC  
ATGCGCGCAACATGCTCGAATCGCAGGCGAGCTCCATTGAGTGTGTTTAC  
ATGCGCGCATAATCAGCGGAATCAGGCGAGCTCCATTGAGTGTGTTTAC  
ATGCGCGCTGATCGTAACAGCTCAGGCGAGCTCCATTGAGTGTGTTTAC  
ATGCGCGCAGCCACTACTAAGTCAGATCGAGCTCCATTGAGTGTGTTTAC  
ATGCGCGCGCACTAACTTCACAGAGATCGAGCTCCATTGAGTGTGTTTAC  
ATGCGCGCCCCGCCATAGTAATAGAGATCGAGCTCCATTGAGTGTGTTTAC  
ATGCGCGCCCTTGAGCATAATCGAGATCGAGCTCCATTGAGTGTGTTTAC  
ATGCGCGCACACGCTGTGAACCTGTCTCGAGCTCCATTGAGTGTGTTTAC  
ATGCGCGCGGACACTATACAGCATTCTCGAGCTCCATTGAGTGTGTTTAC  
ATGCGCGCCATTAGTGACCAGCGAGACGGAGCTCCATTGAGTGTGTTTAC  
ATGCGCGCTATAGTCACGCAGCACGACGGAGCTCCATTGAGTGTGTTTAC  
ATGCGCGCAACTACGATGCAGAGACTGGGAGCTCCATTGAGTGTGTTTAC  
ATGCGCGCATTGCTGCTACACCGACTGGGAGCTCCATTGAGTGTGTTTAC  
ATGCGCGCGCAGATAGCACAAATCGGCCAGAGCTCCATTGAGTGTGTTTAC  
ATGCGCGCTTCCTGGCAAGCAATAGAGAGAGCTCCATTGAGTGTGTTTAC  
ATGCGCGCCCTGCTGATAAAGTACGAGAGAGCTCCATTGAGTGTGTTTAC  
ATGCGCGCGCATTCTACCAAGCTGCATAGAGCTCCATTGAGTGTGTTTAC  
ATGCGCGCCAAGGTGGACCAAGTGCATAGAGCTCCATTGAGTGTGTTTAC  
ATGCGCGCTGCAACTGGCTTCAATTCGCGAGCTCCATTGAGTGTGTTTAC  
ATGCGCGCCCTGCACTAAGATTATTCGCGAGCTCCATTGAGTGTGTTTAC  
ATGCGCGCCCCACTGGATACAGATTTCATCGAGCTCCATTGAGTGTGTTTAC

ATGCGCGCCGACTACAGGCATATTCATCGAGCTCCATTGAGTGTGTTTAC  
ATGCGCGCGCGCTCGATATAACTTCATCGAGCTCCATTGAGTGTGTTTAC  
ATGCGCGCGAGTACGCTCCATAGCTCTGGAGCTCCATTGAGTGTGTTTAC  
ATGCGCGCTATTAGCTGCCAGGGCTCTGGAGCTCCATTGAGTGTGTTTAC  
ATGCGCGCCCAGTCACAAGATAGTGCCAGAGCTCCATTGAGTGTGTTTAC  
ATGCGCGCATCATTGTGCGCAGGGTGCATGAGCTCCATTGAGTGTGTTTAC  
ATGCGCGCATCACTGTAGTCACGTAGCTGAGCTCCATTGAGTGTGTTTAC  
ATGCGCGCTCATTGCTGGCAGTGTAGCTGAGCTCCATTGAGTGTGTTTAC  
ATGCGCGCAGTGCAGTCGGCCATTAGCTGAGCTCCATTGAGTGTGTTTAC  
ATGCGCGCGCCAGATTGAAACACTGCCAGAGCTCCATTGAGTGTGTTTAC  
ATGCGCGCGAGAGAGTCAACAACCTGCCAGAGCTCCATTGAGTGTGTTTAC  
ATGCGCGCCCAGCATTGAAATTCTGCCAGAGCTCCATTGAGTGTGTTTAC

| Corresponding 5' Barcode | Reverse PCR Primer |
|--------------------------|--------------------|
| for20.148                | D145               |
| for20.150                | D147               |
| for20.151                | D156               |
| for20.152                | D160               |
| for20.162                | D165               |
| for20.164                | D171               |
| for20.166                | D175               |
| for20.167                | D177               |
| for20.172                | D181               |
| for20.173                | D185               |
| for20.174                | D195               |
| for20.178                | D196               |
| for20.179                | D199               |
| for20.182                | D202               |
| for20.183                | D206               |
| for20.184                | D212               |
| for20.186                | D213               |
| for20.187                | D219               |
| for20.188                | D221               |
| for20.189                | D224               |
| for20.190                | D227               |
| for20.191                | D228               |
| for20.192                | D243               |
| for20.193                | D244               |
| for20.194                | D245               |
| for20.197                | D248               |
| for20.198                | D254               |
| for20.204                | D259               |
| for20.205                | D261               |
| for20.207                | D264               |
| for20.208                | D265               |
| for20.209                | D266               |
| for20.210                | D269               |
| for20.211                | D271               |
| for20.214                | D145d              |
| for20.215                | D148d              |
| for20.220                | D150d              |
| for20.223                | D152d              |
| for20.225                | D160d              |
| for20.226                | D171d              |
| for20.241                | D172d              |
| for20.246                | D174d              |
| for20.247                | D175d              |
| for20.249                | D177d              |
| for20.250                | D178d              |
| for20.253                | D179d              |
| for20.255                | D182d              |
| for20.256                | D184d              |

SPI-1D  
SPI-2D  
SPI-3D  
SPI-4D  
SPI-5D  
SPI-6D  
SPI-7D  
SPI-8D  
SPI-9D  
SPI-10D  
SPI-11D  
SPI-12D

Sequence (5'->3')

TAGGGCCCGGCATGGATGTGCTCCCTAATTACTAAAATGAGTCAAGCCAACG  
TAGGGCCCGGCATCACTGGTTACGTCTGTTACTAAAATGAGTCAAGCCAACG  
TAGGGCCCGAGACGCTTCCATCACATTACTAAAATGAGTCAAGCCAACG  
TAGGGCCCGAAAGGTTATGCCACATGCTTTACTAAAATGAGTCAAGCCAACG  
TAGGGCCCCGTGAGCATGAGTGCCTCTATTACTAAAATGAGTCAAGCCAACG  
TAGGGCCCCCATAACATTACAGAGAGTGGTTACTAAAATGAGTCAAGCCAACG  
TAGGGCCCCAGACGGTGCGCCATGAATATTACTAAAATGAGTCAAGCCAACG  
TAGGGCCCATGCAAACGCTCCTCATGTTTACTAAAATGAGTCAAGCCAACG  
TAGGGCCCAGCGGCTCTCGCATCAGAATTTACTAAAATGAGTCAAGCCAACG  
TAGGGCCCTGGATTCATTTGCCGCATGGTTACTAAAATGAGTCAAGCCAACG  
TAGGGCCCTATCTCAGTTGCTCGCATGGTTACTAAAATGAGTCAAGCCAACG  
TAGGGCCCCGTGTGCATTGAGTCTATGACTTACTAAAATGAGTCAAGCCAACG  
TAGGGCCCCGTGTGACATTCTGCTATCGGTTACTAAAATGAGTCAAGCCAACG  
TAGGGCCCGGCAGCTTGAGACGCATTCTTTACTAAAATGAGTCAAGCCAACG  
TAGGGCCCCGCTGATATTCATTACAGCTTACTAAAATGAGTCAAGCCAACG  
TAGGGCCCGAGACAGCTCTTCCGAACATTTACTAAAATGAGTCAAGCCAACG  
TAGGGCCCGAGACACTTATGGCTCATGTTTACTAAAATGAGTCAAGCCAACG  
TAGGGCCCCCTTGAGGCGCGTGTCCATATTTACTAAAATGAGTCAAGCCAACG  
TAGGGCCCCGTCTCATGCCTGCGTATAGTTACTAAAATGAGTCAAGCCAACG  
TAGGGCCCCCATAATGCGCGTGCAGGAAATTTACTAAAATGAGTCAAGCCAACG  
TAGGGCCCCCAGTCAGTGCGGTCATCATTTACTAAAATGAGTCAAGCCAACG  
TAGGGCCCCAGACGCATGGTCAGACGTATTACTAAAATGAGTCAAGCCAACG  
TAGGGCCCTGGCATCGTTTACCTGCTGTTACTAAAATGAGTCAAGCCAACG  
TAGGGCCCTGGCATATTGTGATCTCGGCTTACTAAAATGAGTCAAGCCAACG  
TAGGGCCCTCTCTCATTGTAGTGGGCGATTACTAAAATGAGTCAAGCCAACG  
TAGGGCCCTATGCCATTGCTGTGATGCTTACTAAAATGAGTCAAGCCAACG  
TAGGGCCCGCAATGCTTCCCTAACCATGTTACTAAAATGAGTCAAGCCAACG  
TAGGGCCCGATGAACATGCGTTACTCTGTTACTAAAATGAGTCAAGCCAACG  
TAGGGCCCGAGAGCCATTCAGTCATCTGTTACTAAAATGAGTCAAGCCAACG  
TAGGGCCCCCATCTAGTCTACTCTGAAGTTACTAAAATGAGTCAAGCCAACG  
TAGGGCCCCCATCGGTGCTCCAGAATAGTTACTAAAATGAGTCAAGCCAACG  
TAGGGCCCCCATCGAATCGTCTATCAGTTTACTAAAATGAGTCAAGCCAACG  
TAGGGCCCCAGAGCGGTGCATAGCCTAATTACTAAAATGAGTCAAGCCAACG  
TAGGGCCCCAGAGCCATGCTACATCGTTTTACTAAAATGAGTCAAGCCAACG  
TAGGGCCCATCTGAGAGCTAGTCGGCATTACTAAAATGAGTCAAGCCAACG  
TAGGGCCCAGCAGGCATGGAAGCCACTATTACTAAAATGAGTCAAGCCAACG  
TAGGGCCCAAGAACGCTCGCATCACTGATTACTAAAATGAGTCAAGCCAACG  
TAGGGCCCAACTGAACGCACGTCACATGTTACTAAAATGAGTCAAGCCAACG  
TAGGGCCCTGCTCATGTTTGCCTAACGGTTACTAAAATGAGTCAAGCCAACG  
TAGGGCCCCGTGCCATTGCATCTCTGTGCTTACTAAAATGAGTCAAGCCAACG  
TAGGGCCCCGTGCCATATCTGTGGTGCATTTACTAAAATGAGTCAAGCCAACG  
TAGGGCCCCGGAATAGCTTCATCTGCTGTTTACTAAAATGAGTCAAGCCAACG  
TAGGGCCCCGGAAGTTATTCACCATGCTGTTACTAAAATGAGTCAAGCCAACG  
TAGGGCCCCGCCATGATTCGACTGGATTTTACTAAAATGAGTCAAGCCAACG  
TAGGGCCCCGCCATGAATTAGAATGCGTGTTACTAAAATGAGTCAAGCCAACG  
TAGGGCCCCGCCATAGCTTCGACACGATTTTACTAAAATGAGTCAAGCCAACG  
TAGGGCCCCGATACTAATTCAGCATCGGGTTACTAAAATGAGTCAAGCCAACG  
TAGGGCCCCGATACGCCTTAGTAGTCATGTTACTAAAATGAGTCAAGCCAACG

TAGGGCCCATGCACGATCCTCTACATTGTTACTAAAATGAGTCAAGCCAACG  
TAGGGCCCAGCAGTAATGACAGCGTGCATTACTAAAATGAGTCAAGCCAACG  
TAGGGCCCAACTGTATCACCAGCTCAAGTTACTAAAATGAGTCAAGCCAACG  
TAGGGCCCTTGCTTTCTTGCACGGCCAGTTACTAAAATGAGTCAAGCCAACG  
TAGGGCCCTCGCCTGATTTATATCCAGCTTACTAAAATGAGTCAAGCCAACG  
TAGGGCCCTCGCCGCTTGTCGAGCTATTTTACTAAAATGAGTCAAGCCAACG  
TAGGGCCCTCGCCCTGTGTTGGCTATGATTACTAAAATGAGTCAAGCCAACG  
TAGGGCCCTATAGACTTGGCTGATAGGCTTACTAAAATGAGTCAAGCCAACG  
TAGGGCCCTATAGAAATTGCAGCTCGCGTTACTAAAATGAGTCAAGCCAACG  
TAGGGCCCGTGCCAGTTGATCCACTCTTTTACTAAAATGAGTCAAGCCAACG  
TAGGGCCCGATACTCGTTCAGCACGTCTTTACTAAAATGAGTCAAGCCAACG  
TAGGGCCCGATACGCTTATGGCTGGCTCTTACTAAAATGAGTCAAGCCAACG



Corresponding 3' Barcode

for20.145  
for20.147  
for20.156  
for20.160  
for20.165  
for20.171  
for20.175  
for20.177  
for20.181  
for20.185  
for20.195  
for20.196  
for20.199  
for20.202  
for20.206  
for20.212  
for20.213  
for20.219  
for20.221  
for20.224  
for20.227  
for20.228  
for20.243  
for20.244  
for20.245  
for20.248  
for20.254  
for20.259  
for20.261  
for20.264  
for20.265  
for20.266  
for20.269  
for20.271  
D145  
D148  
D150  
D152  
D160  
D171  
D172  
D174  
D175  
D177  
D178  
D179  
D182  
D184
