# Supplementary material
Source: PubMed Central journal article supplement (PMC3126141)
Supplement: supp_85_8_3780__4.pdf [file supp_85_8_3780__4.pdf]

Table S4

| Barcode Pair | P2 vs. P1 | p-value* | P3 vs. P1 | p-value* | P4 vs. P1 | p-value* |
|--------------|-----------|----------|-----------|----------|-----------|----------|
| for20.145    | -0.29     | 2.56E-02 | -0.74     | 1.43E-05 | -0.95     | 7.56E-07 |
| for20.148    | 0.10      | 5.94E-01 | 0.48      | 2.46E-03 | 0.20      | 1.75E-01 |
| for20.151    | -1.01     | 2.85E-07 | -1.88     | 8.68E-11 | -2.55     | 2.35E-12 |
| for20.156    | -0.59     | 1.61E-03 | -1.92     | 1.35E-08 | -2.61     | 3.14E-10 |
| for20.152    | -0.27     | 1.24E-02 | -0.28     | 6.52E-03 | -0.54     | 2.68E-05 |
| for20.160    | -0.36     | 2.77E-03 | -0.66     | 9.35E-06 | -0.85     | 4.52E-07 |
| for20.164    | 0.18      | 1.16E-01 | 0.68      | 1.16E-05 | 0.92      | 3.60E-07 |
| for20.171    | 0.03      | 8.97E-01 | 0.17      | 2.50E-01 | 0.56      | 4.65E-04 |
| for20.166    | -0.91     | 3.51E-02 | -1.25     | 4.55E-03 | -1.51     | 9.87E-04 |
| for20.175    | -1.36     | 3.18E-03 | -2.54     | 9.35E-06 | -3.87     | 6.98E-08 |
| for20.167    | -0.96     | 3.08E-02 | -1.40     | 2.41E-03 | -2.43     | 1.41E-05 |
| for20.177    | -1.48     | 3.03E-02 | -2.31     | 1.39E-03 | -3.81     | 1.19E-05 |
| for20.172    | -0.67     | 2.27E-03 | -0.19     | 3.60E-01 | -0.70     | 8.11E-04 |
| for20.181    | -0.72     | 3.47E-04 | -1.86     | 2.26E-08 | -2.23     | 1.82E-09 |
| for20.173    | -0.62     | 1.56E-01 | -0.44     | 3.46E-01 | -1.32     | 2.47E-03 |
| for20.185    | -1.55     | 1.18E-02 | -3.06     | 3.51E-05 | -4.40     | 6.45E-07 |
| for20.182    | -0.44     | 8.62E-03 | -0.84     | 2.72E-05 | -1.22     | 4.29E-07 |
| for20.202    | -0.70     | 3.25E-05 | -1.47     | 1.28E-08 | -1.95     | 3.14E-10 |
| for20.183    | -0.61     | 6.35E-05 | -0.63     | 2.30E-05 | -1.17     | 2.54E-08 |
| for20.206    | -0.57     | 1.18E-02 | -0.72     | 1.64E-03 | -1.45     | 1.99E-06 |
| for20.184    | -0.99     | 5.71E-05 | -1.34     | 1.46E-06 | -2.12     | 7.43E-09 |
| for20.212    | -1.20     | 2.17E-05 | -2.56     | 3.85E-09 | -3.50     | 7.72E-11 |
| for20.186    | -0.62     | 1.28E-04 | -0.96     | 9.25E-07 | -1.21     | 4.89E-08 |
| for20.213    | -0.85     | 3.21E-05 | -1.49     | 5.17E-08 | -1.87     | 2.90E-09 |
| for20.198    | -0.21     | 1.70E-01 | -0.31     | 3.37E-02 | -0.45     | 2.75E-03 |
| for20.254    | -0.15     | 4.08E-01 | -0.45     | 5.27E-03 | -0.61     | 4.63E-04 |
| for20.208    | -0.51     | 6.31E-04 | -0.65     | 4.22E-05 | -1.01     | 3.60E-07 |
| for20.265    | -0.90     | 1.44E-06 | -2.08     | 6.94E-11 | -2.63     | 2.35E-12 |
| for20.211    | -1.27     | 2.51E-02 | -2.22     | 4.02E-04 | -3.19     | 1.07E-05 |
| for20.271    | -0.68     | 1.91E-01 | -1.47     | 4.76E-03 | -2.45     | 6.11E-05 |
| for20.215    | -0.97     | 2.27E-03 | -1.40     | 5.66E-05 | -2.06     | 8.67E-07 |
| D.148        | -1.04     | 2.77E-03 | -2.65     | 3.24E-07 | -3.50     | 9.25E-09 |
| for20.220    | -1.63     | 2.20E-05 | -2.34     | 2.05E-07 | -3.07     | 6.49E-09 |
| D.150        | -1.13     | 2.51E-02 | -2.04     | 2.77E-04 | -3.18     | 2.77E-06 |
| for20.241    | -0.88     | 2.38E-05 | -1.06     | 1.35E-06 | -1.66     | 7.43E-09 |
| D.172        | -0.72     | 2.72E-04 | -1.66     | 4.23E-08 | -2.06     | 2.66E-09 |
| for20.246    | -1.03     | 6.72E-06 | -1.51     | 3.88E-08 | -1.74     | 3.97E-09 |
| D.174        | -0.94     | 1.70E-01 | -1.40     | 3.28E-02 | -1.59     | 1.52E-02 |
| for20.247    | -0.60     | 3.21E-05 | -0.70     | 2.99E-06 | -1.26     | 3.97E-09 |
| D.175        | -0.71     | 4.01E-05 | -1.24     | 7.74E-08 | -1.79     | 1.21E-09 |
| for20.249    | -0.41     | 3.48E-04 | -0.56     | 1.16E-05 | -0.91     | 4.23E-08 |
| D.177        | -0.52     | 5.05E-03 | -0.89     | 3.68E-05 | -1.18     | 1.59E-06 |
| for20.253    | -1.54     | 1.17E-07 | -2.64     | 6.94E-11 | -3.91     | 9.68E-13 |
| D.179        | -1.07     | 1.01E-02 | -1.47     | 6.50E-04 | -2.19     | 1.21E-05 |
| for20.256    | -0.96     | 1.48E-05 | -1.25     | 2.78E-07 | -2.08     | 1.06E-09 |
| D.184        | -0.94     | 1.79E-02 | -1.73     | 1.31E-04 | -2.30     | 6.35E-06 |

\* corrected for multiple hypothesis testing
