# Supplementary material
Source: PubMed Central journal article supplement (PMC3126141)
Supplement: supp_85_8_3780__5.pdf [file supp_85_8_3780__5.pdf]

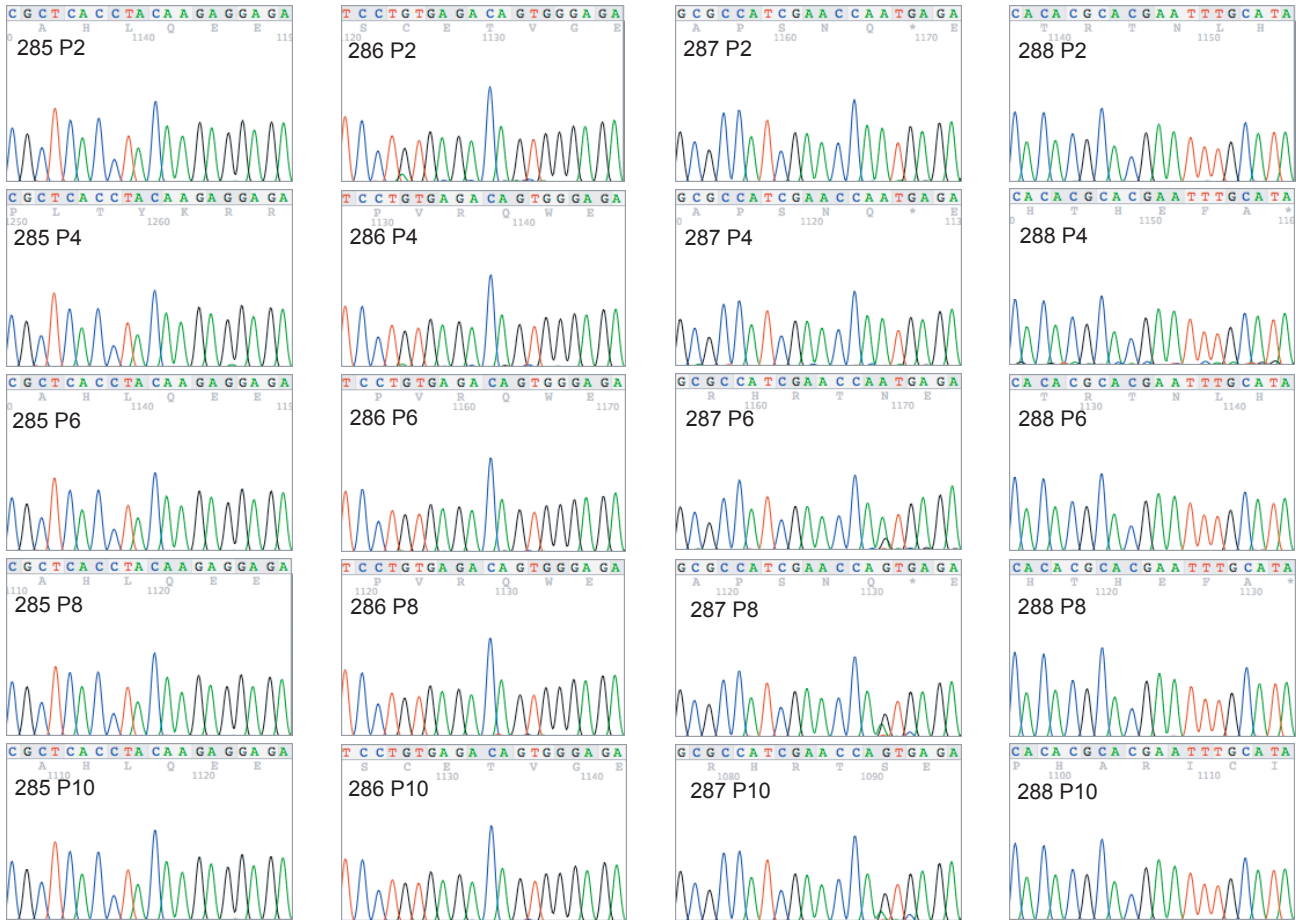

Figure S1: Barcode sequences are maintained after repeated passage. Electropherograms for the population sequencing experiment described in Figure 2B. The virus population (i.e. barcode sequence) and passage analyzed are indicated in the top left corner of each panel.
